# Supplementary material for: Calmodulin disruption impacts growth and motility in juvenile liver fluke
Source: PubMed Central journal article supplement (PMC4730779; doi:10.1186/s13071-016-1324-9), 2016-01-27
Supplement: 13071_2016_1324_MOESM1_ESM.pdf [file 13071_2016_1324_MOESM1_ESM.pdf]

## Supplementary material

### Calmodulin disruption impacts growth and motility in juvenile liver fluke

Erin M. McCammick <sup>a</sup>, Paul McVeigh <sup>a</sup>, Paul McCusker <sup>a</sup>, David J. Timson <sup>a</sup>,  
Russell M. Morphew <sup>b</sup>, Peter M. Brophy <sup>b</sup>, Nikki J. Marks <sup>a</sup>, Angela Mousley <sup>a</sup>,  
Aaron G. Maule <sup>a,\*</sup>

\*Address correspondence to A G Maule, [a.maule@qub.ac.uk](mailto:a.maule@qub.ac.uk)

```
FhCaM1_scaff210      -ADQLTEEQIAEFKAEFSLFDKDKDGGTITTKELGTVMRS LGQNPTAE LQDMINEVDADG
FhCaM1_scaff932_1   MADQLTEEQIAEFKAEFFLFDKDKDGGTITTKELGTVMRS LGQNPTAE LQDMINEVDAD-
FhCaM1_scaff932_2   -----LFDKDKDGGTITTKELGTVMRS LGQNPTAE LQDMINEVDAD-
FhCaM2_scaff2277    -VHHL SQDDIEVLRRAF SMYDQNGDGE IDATE LKGV MWRLGCKP SDAEVREMI RKVDFD-
FhCaM3_scaff1560    MA---DFDMDHQLKEAFRNI DKNNGDGF L SQDEI SECLEMFGFKKNQSEYFMTLYDT---N
                                     *::*** : * : : * : : : * : : ..
                                     < Linker Helix >
FhCaM1_scaff932_1   GNGTIDFPEFLTMMARKMKD TDS-EEEI REAFRV FDKDGN GFISA AEL-RHVMTNLGEKL
FhCaM1_scaff932_2   GNGTIDFPEFLTMMARKMKD TDS-EEEI REAFRV FDKDGN GFISA AEL-RHVMTNLGEKL
FhCaM1_scaff210     GNGTIDFPEFLTMMARKMKD TDS-EEEI REAFRV FDKDGN GFISA AELRRHVMTNLGEKL
FhCaM2_scaff2277    DSGTINFPPEFISMMVQK RHAET-DANLRI AFQFFDRNGDGYISP EELRSVL-HKYRGNL
FhCaM3_scaff1560    NDGKISLDEFIKTTKR RVS DRDTTCAL LRNTFR TIDQD HSGKITASE LHKKFFN-SSMGIV
                                     .*. .: **:. :. : : : * : * : : * : . * * : * * . . :
FhCaM1_scaff932_1   TDEEVDEMIREADIDG DGQV NYEEFVKMMTAK-
FhCaM1_scaff932_2   TDEEVDEMIREADIDG DGQV NYEEFVKMMTAK-
FhCaM1_scaff210     TDEEVDEMIREADIDG DGQV NYE-----
FhCaM2_scaff2277    DNNETEAI IKTVDTRD GKLNYEEFL TLLRNQ-
FhCaM3_scaff1560    VPTTVEQWIEDHDKDGN ALSFE EFLEFAYEYL
                                     .: * . * * * : : *
```

### Supplementary Figure 1

Multiple amino acid sequence alignment of the *F. hepatica* calmodulin proteins encoded in the genome. An asterisk (\*) indicates fully conserved/identical amino acids, a colon (:) indicates conservation between strongly similar amino acids, and a period (.) indicates conservation between weakly similar amino acids. Gray shading indicates the EF-hand domains (Ca-binding sites) and the brackets enclose the alpha-helix linker domain. These proteins are coded for at the following (inclusive) locations: FhCaM1\_Scaff932\_1, 149aa, coded at positions 97899-98345; FhCaM1\_Scaff932\_2, 131aa, coded at positions 98778-99170; FhCaM1\_Scaff210, 139aa, coded at positions 222587-222763, 222801-222938, 227165-227266; FhCaM2\_Scaff 2277, 148aa, coded at positions 89419-89246, 89207-89067, 74404-74303, 73311-73285; FhCaM3\_Scaff1560, 146aa, coded at positions 175743-175609, 169742-169644, 168552-168394, 167886-167842. Note FhCaM2 and FhCaM3 are coded on the reverse strand of their respective scaffolds and the positions presented represent the complement strand.
